# Supplementary material for: Automated chemical identification and library building using dispersion plots for differential mobility spectrometry
Source: Royal Society of Chemistry journal article supplement (doi:10.1039/c8ay00846a), 2018-01-01
Supplement: c8ay00846a1.pdf [file c8ay00846a1.pdf]

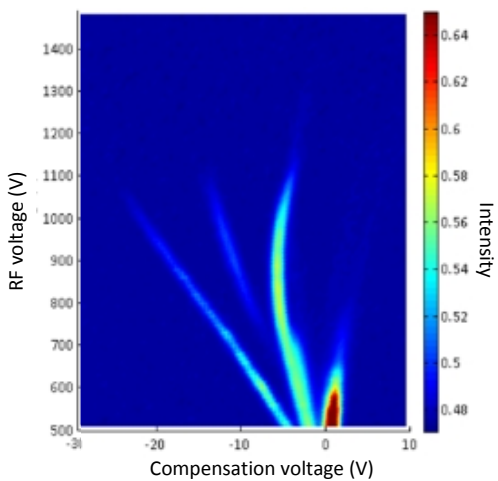

Supplementary Figure: DMS dispersion plot of 500 ppb of 2-butanone and ethyl acetate at 80°C drift tube temperature.
